# Supplementary material for: CRISPR technologies and the search for the PAM-free nuclease
Source: PubMed Central journal article supplement (PMC7822910; doi:10.1038/s41467-020-20633-y), 2021-01-22
Supplement: 41467_2020_20633_MOESM2_ESM.pdf [file 41467_2020_20633_MOESM2_ESM.pdf]

**Title:** Supplementary Data 1.

**Description:** Complete list of Type II and Type V Cas orthologs with characterized PAMs. Information regarding % identity to SpyCas9 or FnCas12a, the PAM determination method, the validation method, and whether a crystal structure is available are also included.

**Title:** Supplementary Data 2.

**Description:** List of engineered Type II and Type V Cas nuclease variants. Information regarding the PAM determination method and off-target analysis are also included
